# Supplementary material
Source: PubMed Central journal article supplement (PMC11459266)
Supplement: NIHMS2023851-supplement-Supplementary_Table_1.pdf [file NIHMS2023851-supplement-Supplementary_Table_1.pdf]

## Primer Table

| Assay     | Target                  | Forward                        | Reverse                        |
|-----------|-------------------------|--------------------------------|--------------------------------|
| qPCR      | <i>Ncor1</i>            | AGGTATGAAACGGCTAGTGATG         | TGCTGTGGAGATGGTGATTC           |
| qPCR      | <i>Ncor2</i>            | CCGTGTCCCAGTGTAAAGAAC          | CTCCATCTCTTCGTCCTCAG           |
| qPCR      | <i>Hdac3</i>            | CCTGGAACAGGTGACATGTATGA        | CGTAAGGGCACATTGAGACAATAG       |
| qPCR      | <i>Cidec</i>            | GCATCATGGCTCACAGCTT            | ATTGTGCCATCTTCCTCCAG           |
| qPCR      | <i>Plin2</i>            | AAGAGGCCAAACAAAAGAGCCAGGAGACCA | ACCCTGAATTTTCTGGTTGGCACTGTGCAT |
| qPCR      | <i>Scd1</i>             | GCCCCTACGACAAGAACATT           | CATGCAGTCGATGAAGAACG           |
| qPCR      | <i>Cd36</i>             | CGGACATTGAGATTCTTTTCC          | TCCTTTAAGGTCGATTTTCAGATC       |
| qPCR      | <i>Ppargc1a (Pgc1a)</i> | CCCTGCCATTGTTAAGACC            | TGCTGCTGTTCCCTGTTTTT           |
| qPCR      | <i>Pck1</i>             | CTGCATAACGGTCTGGACTTC          | CAGCAACTGCCCCGACTCC            |
| qPCR      | <i>Slc2a2</i>           | TCAGAAGACAAGATCACCGGA          | GCTGGTGTGACTGTAAGTGGG          |
| qPCR      | <i>Got1</i>             | GCTGTGCTTCTCGCCTAGTT           | AAGACTGCACCCCTCCAAC            |
| qPCR      | <i>Pcx</i>              | CAGTGGCTGTCTACTCGGAG           | CCGCATCTACACCTTTTCC            |
| qPCR      | <i>Fbp1</i>             | AGTCGTCTACGCTACCTGTG           | GGGGATCGAAACAGACAACAT          |
| qPCR      | <i>Ldha</i>             | CAAAGACTACTGTGTAAGTGC          | TGGACTGTACTTGACAATGTTGG        |
| qPCR      | <i>Slc38a2</i>          | GGGCAGTGGAAATCCTTGGG           | AGATGGACGGAGTATAGCGAAAA        |
| qPCR      | <i>Slc38a3</i>          | GGAGGGGCTTCTACCAGTG            | AAAGGATGATGCCCGTATTGG          |
| qPCR      | <i>Gpt</i>              | TCCAGGCTTCAAGGAATGGAC          | CAAGGCACGTTGCACGATG            |
| qPCR      | <i>Got2</i>             | CCTGGGCGAGAACAATGAAGT          | ATGGGCGTGTGATTTCCCC            |
| qPCR      | <i>Gls2</i>             | GTGTCTGGGATCCAGGTGTG           | ATGTAGGCTGCCACTTTGCC           |
| qPCR      | <i>Slc37a4</i>          | TGGCTGGAAGTTTGGGACCTA          | GTCCAACATCAGCAGGTTTCCAT        |
| qPCR      | <i>G6Pc</i>             | TCTGTCCCAGGATCTACCTTG          | GAAAGTTTCAGCCACAGCAA           |
| qPCR      | <i>Cdkn1a</i>           | CCTGGTGATGTCCGACCTG            | CCATGAGCGCATCGCAATC            |
| qPCR      | <i>Cyp2b10</i>          | TGCTGTCTGTTGAGCCAACC           | CCACTAAACATTGGGCTTCC           |
| qPCR      | <i>Hif3a</i>            | GAAGTTCACATACTGCGACGA          | GTCCAAAGCGTGGATGTATTCAT        |
| qPCR      | <i>Hmgcl</i>            | CCGGCATCAACTACCCAGTC           | GCGCTGGAAACTCTCCTCTAT          |
| qPCR      | <i>Hmgcs2</i>           | CTGTGGCAATGCTGATCG             | TCCATGTGAGTTCCCTCA             |
| qPCR      | <i>Pdk4</i>             | GATTGACATCCTGCCTGACC           | CATGGAACCTCCACCAAATCC          |
| qPCR      | <i>Acox1</i>            | TAACTTCCTCACTCGAAGCCA          | AGTTCCATGACCCATCTCTGTC         |
| qPCR      | <i>Gck</i>              | AGGAGGCCAGTGTAAAGATGT          | CTCCCAGGTCTAAGGAGAGAAA         |
| qPCR      | 36b4                    | TCATCCAGCAGGTGTTTGACA          | GGCACCGAGGCAACAGTT             |
| ChIP-qPCR | Negative Control        | GGCAATTTGAATGAGAAAAG           | CTGTCTCGAAAAACAAAAC            |
| ChIP-qPCR | Got 1                   | AGGACTCTAGTGGTCCGCTT           | GGAGACAGTCAAGGTCACCC           |
| ChIP-qPCR | Pgc1a                   | TGGCACATGGTGTCCCTAAC           | CTCCCATTGGGCAACAGCTA           |
| ChIP-qPCR | Pck1                    | ACACAAAATGTGCAGCCAGC           | TGATGCAAACTGCAGGCTCT           |
