# Supplementary material
Source: PubMed Central journal article supplement (PMC11459266)
Supplement: NIHMS2023851-supplement-uncropped_gels_ED_FIG1.pdf [file NIHMS2023851-supplement-uncropped_gels_ED_FIG1.pdf]

# Uncropped blots: Extended data Figure 1c

TOP:anti-NCOR1: ECL  
 BOTTOM:anti-NCOR2: ECL

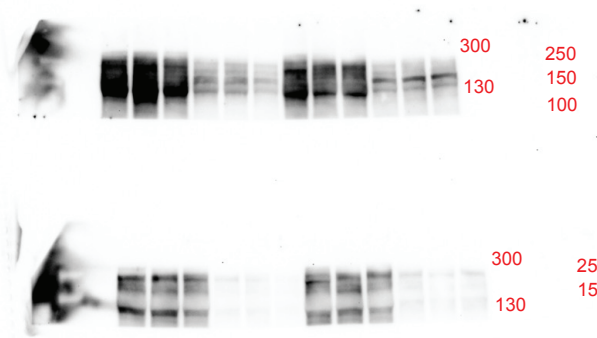

Ladders: Calorimetric

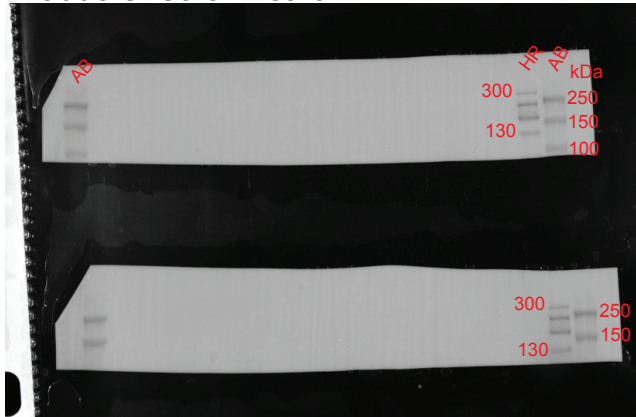

Membrane1

Membrane2

anti-VINCULIN: LICOR 800nm Channel

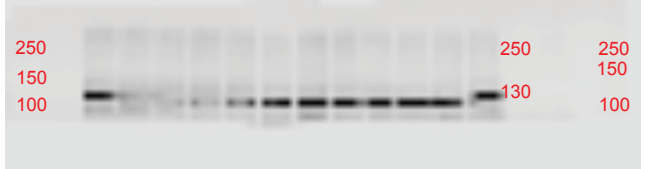

Ladder: 700nm channel

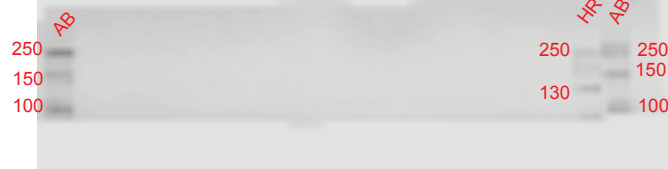

Membrane1

anti-VINCULIN: LICOR 800nm Channel

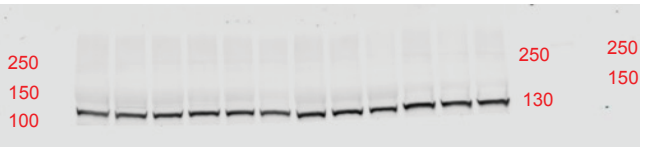

Ladder: LICOR 700nm channel

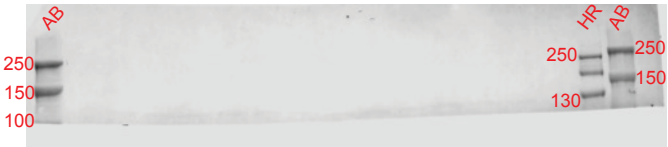

Membrane2

**Ladders:**  
 HR: High Range 40-300 kDa  
 AB: All Blue (10-250 kDa)  
 \*Note: HR bands 300 and 70 cannot be visualized by LICOR due to the dye. All bands are visible by calorimetric scan.

**Samples:**  
 Same protein lysates were loaded into 2 separate gels.

# Uncropped blots: Extended data Figure 1k

## Membrane 1

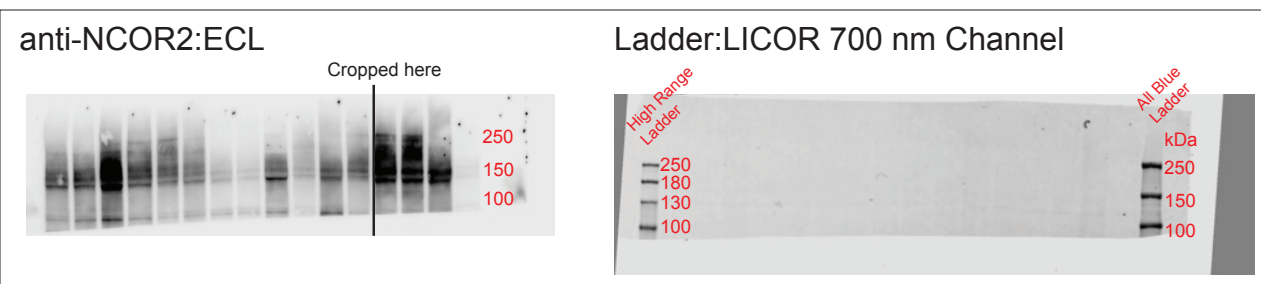

## Membrane 2

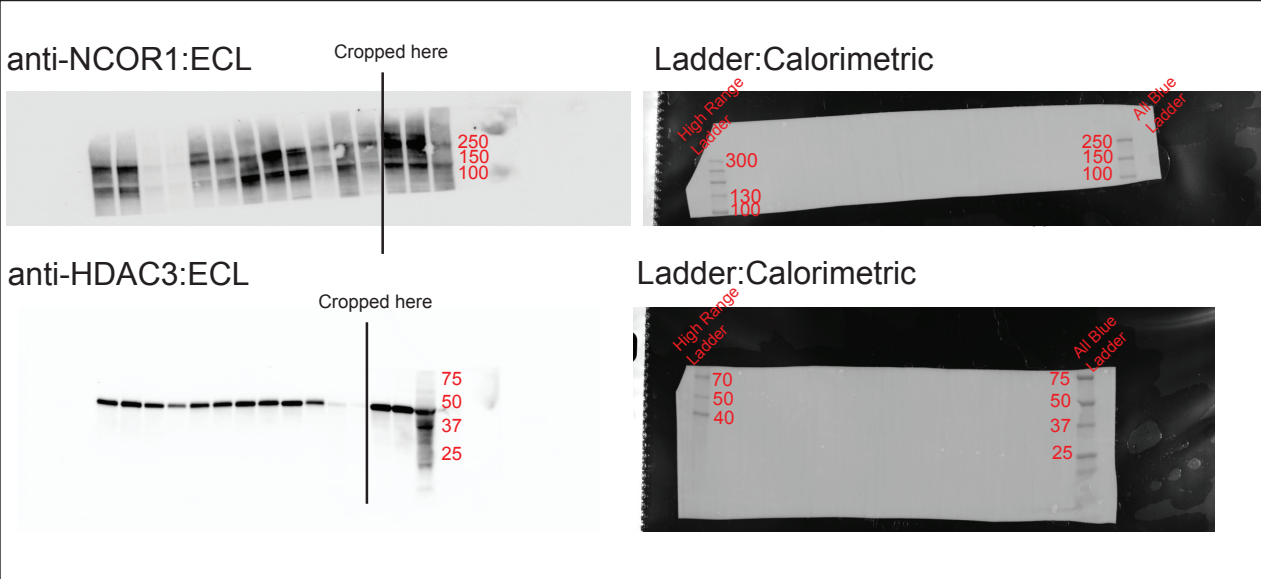

## anti-VINCULIN: LICOR 800 nm Channel

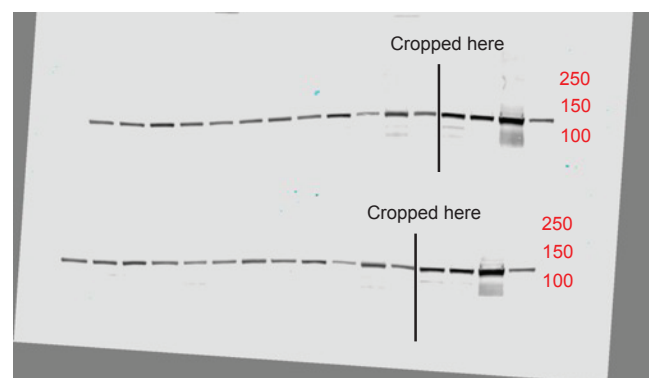

## Ladder: LICOR 700 nm Channel

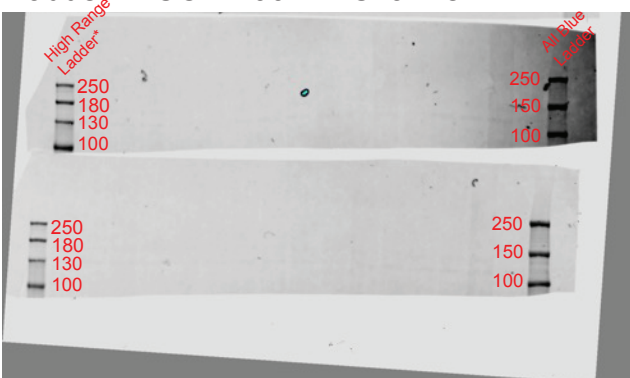

### Ladders:

HR: High Range 40-300 kDa

AB: All Blue (10-250 kDa)

\*\*Note: HR bands 300 and 70 cannot be visualized by LICOR due to the dye. All bands are visible by calorimetric scan.

### Samples:

Same protein lysates were loaded into 2 separate gels. Each membrane was cut in half to accommodate blotting for high and low molecular weight proteins.
