# Supplementary material
Source: PubMed Central journal article supplement (PMC11459266)

# Uncropped blots: Extended data Figure 2e

## Membrane #1

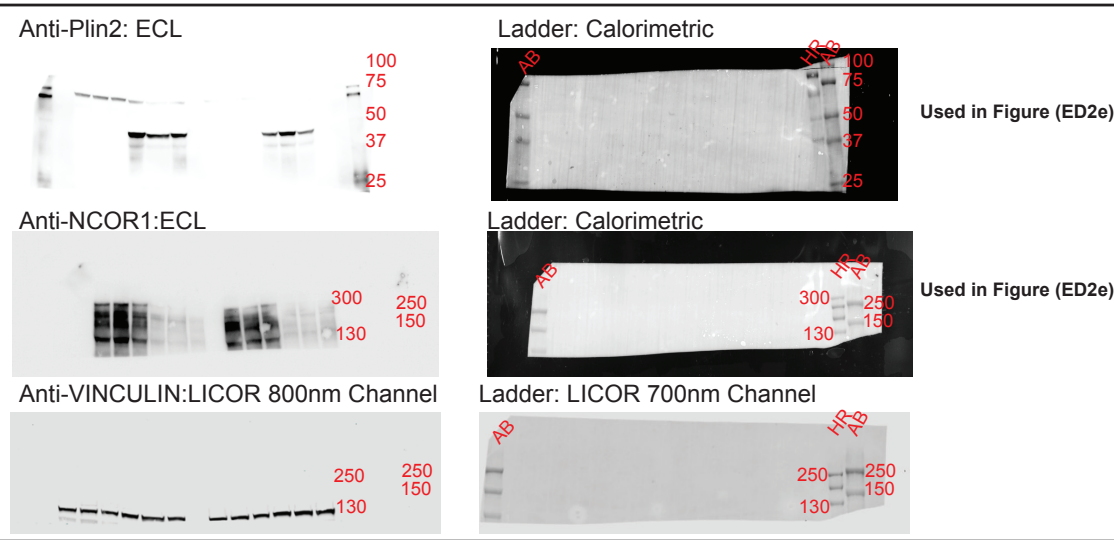

**Samples:**  
 Same protein lysates were loaded into 4 separate gels. Each membrane was cut in half to accommodate blotting for high and low molecular weight proteins.

**Ladders:**  
 HR: High Range 40-300 kDa  
 AB: All Blue (10-250 kDa)

**\*\*Note:** HR bands 300 and 70 cannot be visualized by LICOR due to the dye. All bands are visible by calorimetric scan.

## Membrane #2

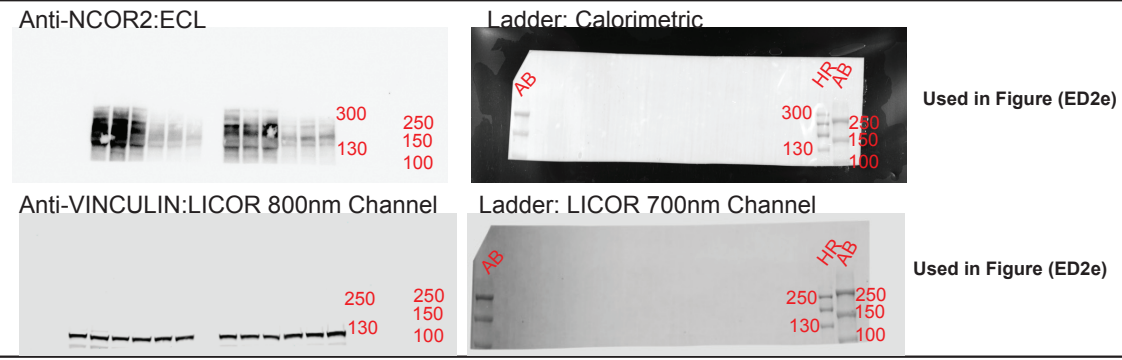

## Membrane #3

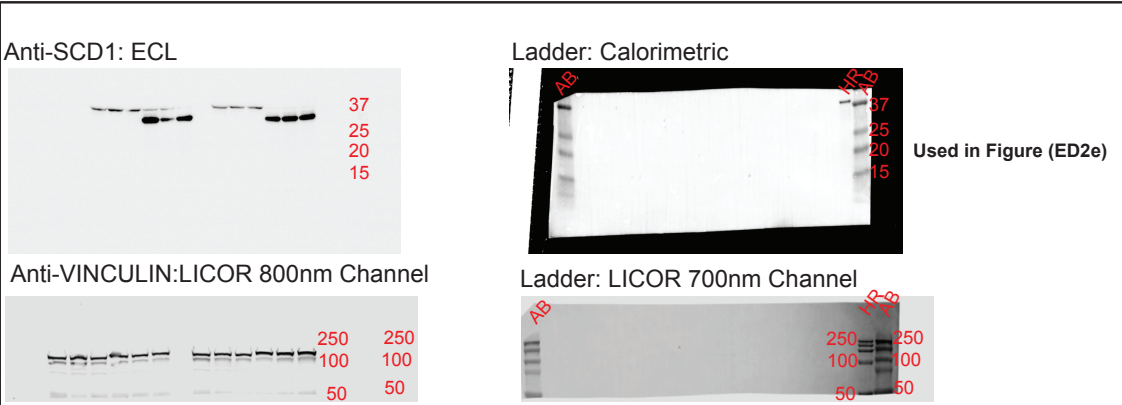

## Membrane #4

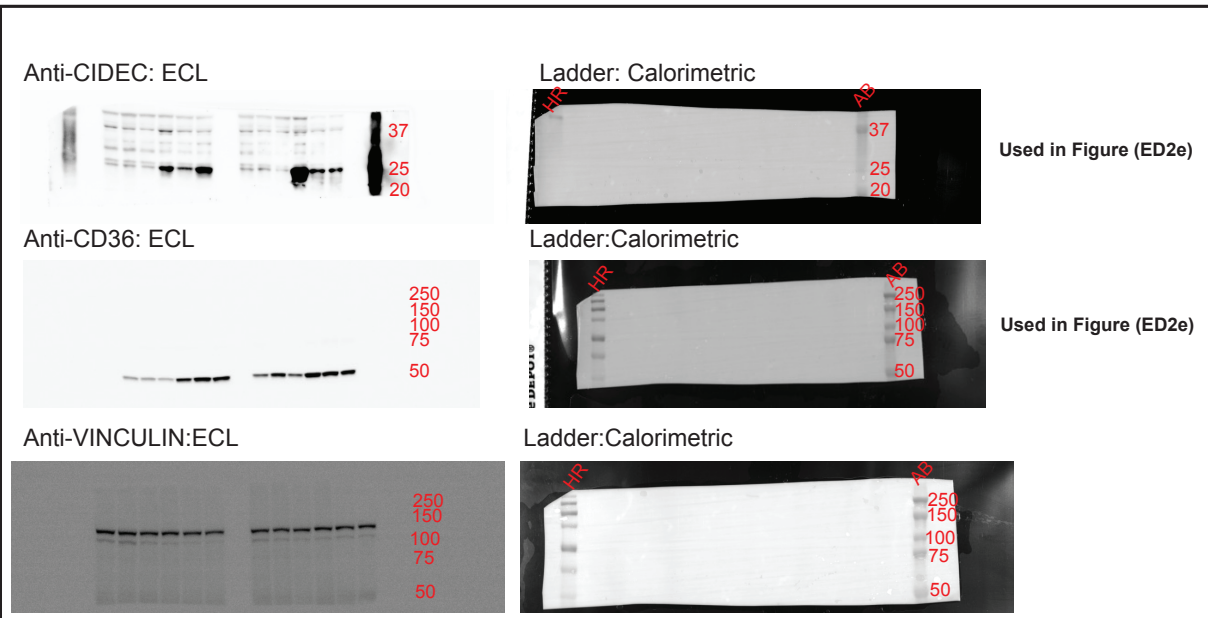

Supplement: NIHMS2023851-supplement-uncropped_gels_ED_FIG2e.pdf [file NIHMS2023851-supplement-uncropped_gels_ED_FIG2e.pdf]
