# Supplementary material
Source: PubMed Central journal article supplement (PMC11459266)
Supplement: NIHMS2023851-supplement-uncropped_gels_ED_FIG8c.pdf [file NIHMS2023851-supplement-uncropped_gels_ED_FIG8c.pdf]

# Uncropped blots: Extended data Figure 8c

## Membrane 1

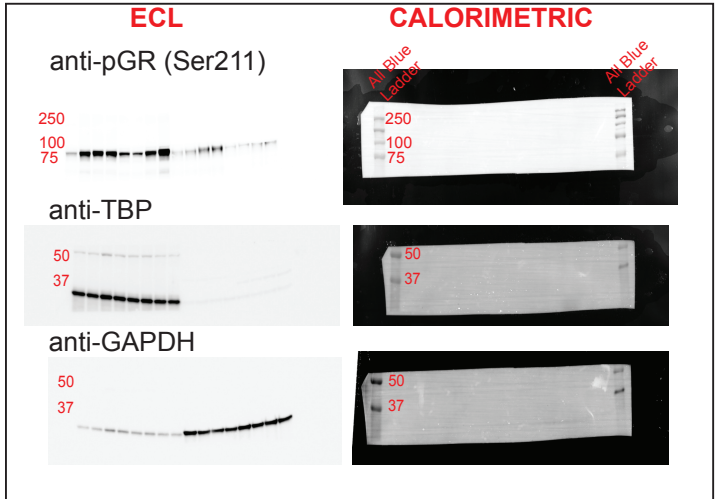

\* USED in PANEL ED 8c

**Samples:**  
Same protein lysates were loaded into 3 separate gels. Each membrane was cut in half to accommodate blotting for high and low molecular weight proteins.

**Ladders:**  
HR: High Range 40-300 kDa  
AB: All Blue (10-250 kDa)  
*\*Note: HR bands 300 and 70 cannot be visualized by LICOR due to the dye. All bands are visible by calorimetric scan.*

## Membrane 2

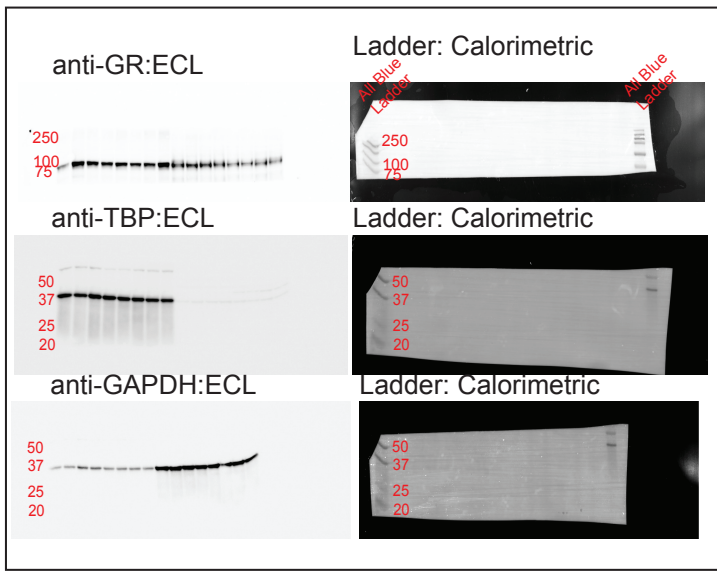

\* USED in PANEL ED 8c

\* USED in PANEL ED 8c

\* USED in PANEL ED 8c

## Membrane 3

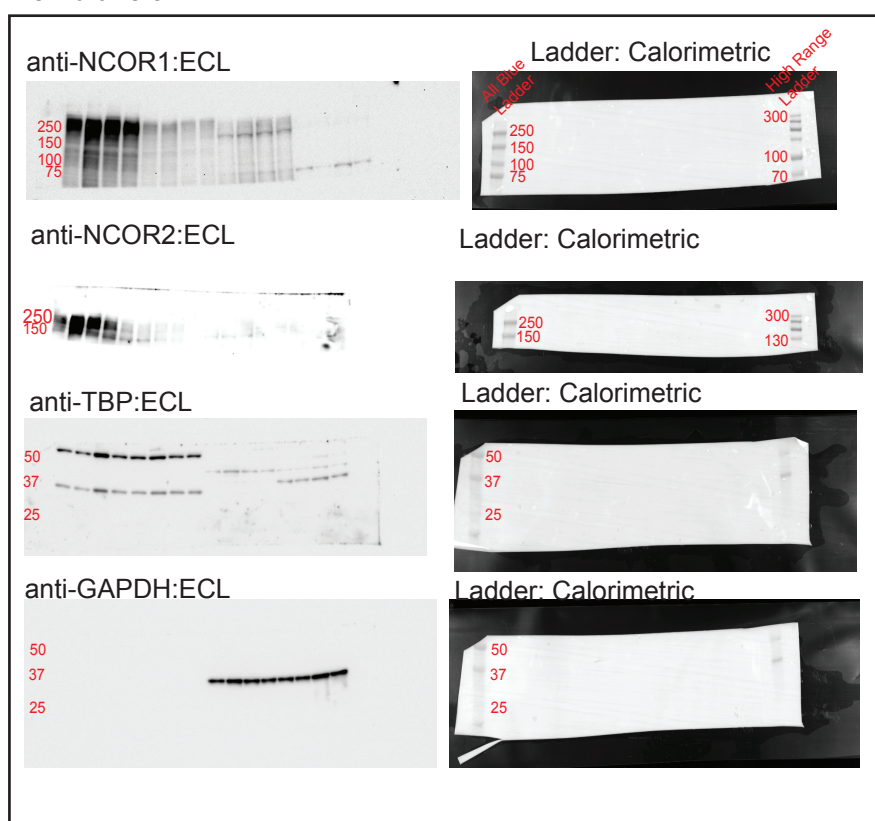

\* USED in PANEL ED 8c

\* USED in PANEL ED 8c
